# Supplementary material for: Quantifying the Ocean, Freshwater and Human Effects on Year-to-Year Variability of One-Sea-Winter Atlantic Salmon Angled in Multiple Norwegian Rivers
Source: PubMed Central journal article supplement (PMC3163678; doi:10.1371/journal.pone.0024005), 2011-08-29
Supplement: pone.0024005.s009.pdf [file pone.0024005.s009.pdf]

**Table S1.** List of the rivers which interannual grilse catches were analyzed in this study. Latitude (N) and longitude (E) give the geographical position of each river mouth. Overall mean  $\pm$ SD (kg), and number of observations (years), with the number of missing years between parentheses, are also shown. The last column indicates the first year (yy) in the time series with hydropower development (HP) and/or salmon farming (F). ‘no’ denotes non-presence of that activity for a given river during the studied period.

| ID | River                        | Latitude | Longitude | Mean catch | SD      | N      | HP / F   |
|----|------------------------------|----------|-----------|------------|---------|--------|----------|
| 1  | Glomma                       | 59°12’   | 10°57’    | 203.32     | 77.95   | 29 (4) | (79, no) |
| 2  | Drammenselva <sup>b</sup>    | 59°44’   | 10°14’    | 1697.04    | 974.21  | 29 (1) | (79, no) |
| 3  | Numedalslågen <sup>d</sup>   | 59°02’   | 10°03’    | 4389.86    | 2021.66 | 28 (0) | (79, no) |
| 4  | Skienselva <sup>c</sup>      | 59°07’   | 9°37’     | 593.7      | 422.27  | 27 (0) | (80, no) |
| 5  | Sokndalselva                 | 58°19’   | 6°17’     | 937.27     | 613.91  | 15 (0) | (93, no) |
| 6  | Ogna <sup>a</sup>            | 58°31’   | 5°48’     | 2494.76    | 1569.77 | 29 (0) | (79, no) |
| 7  | Håelva                       | 58°41’   | 5°32’     | 3299.34    | 2014.47 | 29 (0) | (79, no) |
| 8  | Figgjo                       | 58°48’   | 5°33’     | 3200.76    | 1627.27 | 29 (0) | (79, no) |
| 9  | Suldalslågen <sup>a, d</sup> | 59°29’   | 6°15’     | 357.28     | 246.71  | 29 (0) | (79, 79) |
| 10 | Etneelva                     | 59°40’   | 5°56’     | 955.24     | 534.46  | 29 (0) | (79, 79) |
| 11 | Eikefetelva                  | 60°43’   | 5°33’     | 425.48     | 420.51  | 23 (0) | (no, 81) |
| 12 | Gaular                       | 61°22’   | 5°41’     | 764.62     | 344.43  | 29 (0) | (no, no) |
| 13 | Nausta                       | 61°31’   | 5°44’     | 1986.66    | 1819.62 | 29 (0) | (no, no) |
| 14 | Eidselva                     | 61°54’   | 5°59’     | 446.17     | 220.83  | 29 (0) | (79, no) |
| 15 | Ervikelva                    | 62°10’   | 5°07’     | 241        | 134.2   | 29 (0) | (no, 79) |
| 16 | Åheimselva <sup>d</sup>      | 62°03’   | 5°37’     | 702.25     | 471.17  | 29 (1) | (79, 79) |
| 17 | Austefjordelva               | 62°04’   | 6°19’     | 397.79     | 325.72  | 29 (0) | (79, 79) |
| 18 | Storelva                     | 62°08’   | 6°15’     | 419.77     | 484.22  | 22 (0) | (no, 79) |

|    |                            |        |        |         |         |        |          |
|----|----------------------------|--------|--------|---------|---------|--------|----------|
| 19 | Ørstaelva                  | 62°11' | 6°08'  | 1510.5  | 1391.87 | 29 (1) | (no, 79) |
| 20 | Bondalselva                | 62°12' | 6°28'  | 2075.14 | 2254.72 | 29 (1) | (no, 79) |
| 21 | Vikelva                    | 62°06' | 6°34'  | 267.11  | 209.44  | 29 (1) | (79, 79) |
| 22 | Velledalselva              | 62°20' | 6°36'  | 1161.52 | 745.09  | 29 (0) | (no, 79) |
| 23 | Strandaelva                | 62°18' | 6°56'  | 1265.76 | 1276.21 | 28 (3) | (no, 79) |
| 24 | Korsbrekkelva <sup>b</sup> | 62°05' | 6°52'  | 479.32  | 444.5   | 29 (1) | (no, 79) |
| 25 | Stordalselva               | 62°27' | 6°59'  | 507.45  | 313.27  | 29 (0) | (no, no) |
| 26 | Oselva                     | 62°48' | 7°43'  | 1704.97 | 1967.96 | 29 (0) | (no, 79) |
| 27 | Sylteelva                  | 62°50' | 7°12'  | 564.33  | 572.23  | 29 (2) | (no, 79) |
| 28 | Søya                       | 62°53' | 8°32'  | 390.43  | 260.01  | 29 (1) | (no, no) |
| 29 | Surna                      | 62°58' | 8°40'  | 1396.9  | 933.38  | 29 (0) | (79, no) |
| 30 | Orkla <sup>d</sup>         | 63°19' | 9°50'  | 3202.24 | 2530.16 | 29 (0) | (82, no) |
| 31 | Gaula                      | 63°21' | 10°14' | 5234.79 | 3424.58 | 29 (0) | (79, no) |
| 32 | Nidelva                    | 63°26' | 10°24' | 877.03  | 876.71  | 29 (0) | (79, no) |
| 33 | Stjørdalselva              | 63°26' | 10°54' | 2388.24 | 1163    | 29 (0) | (79, no) |
| 34 | Verdalsvassdraget          | 63°48' | 11°28' | 1499.69 | 1003.42 | 29 (0) | (90, no) |
| 35 | Skauga                     | 63°36' | 9°56'  | 1248.52 | 993.73  | 29 (0) | (79, no) |
| 36 | Nordelva                   | 63°46' | 10°07' | 669.08  | 621.94  | 29 (4) | (79, no) |
| 37 | Stordalselva               | 63°57' | 10°13' | 5319.48 | 3723.88 | 29 (0) | (no, 79) |
| 38 | Steinselva                 | 64°18' | 10°31' | 1192.75 | 812.92  | 29 (1) | (no, 79) |
| 39 | Årgårdselva                | 64°18' | 11°12' | 3553.34 | 2492.31 | 29 (0) | (no, no) |
| 40 | Namsen                     | 64°28' | 11°35' | 5928.72 | 2863.46 | 29 (0) | (79, 79) |
| 41 | Salvassdraget              | 64°42' | 11°26' | 512.72  | 343.67  | 29 (0) | (no, 79) |
| 42 | Kongsmoelva                | 64°53' | 12°27' | 221.86  | 141.88  | 29 (0) | (no, no) |
| 43 | Åelva                      | 65°05' | 12°27' | 410.32  | 237.01  | 29 (4) | (79, 83) |

|    |                             |        |        |           |           |        |          |
|----|-----------------------------|--------|--------|-----------|-----------|--------|----------|
| 44 | Vefsna <sup>b</sup>         | 65°50' | 13°13' | 664.59    | 551.1     | 29 (0) | (79, 79) |
| 45 | Ranavassdraget <sup>b</sup> | 66°20' | 14°09' | 386.46    | 280.45    | 29 (3) | (79, 79) |
| 46 | Laukhellevassdraget         | 69°14' | 17°51' | 606.97    | 376.13    | 29 (0) | (no, 83) |
| 47 | Lakselva (Aursfjorden)      | 69°17' | 18°43' | 186.12    | 137.14    | 29 (3) | (79, 79) |
| 48 | Målselva                    | 69°14' | 18°31' | 1749.9    | 1018.45   | 29 (0) | (79, no) |
| 49 | Altaelva                    | 69°58' | 23°23' | 2798.34   | 1528.16   | 29 (0) | (87, 83) |
| 50 | Repparfjordelva             | 70°27' | 24°20' | 2257.93   | 1368.6    | 29 (0) | (no, 84) |
| 51 | Stabburselva                | 70°11' | 24°54' | 915.62    | 522.32    | 29 (0) | (no, no) |
| 52 | Lakselva                    | 70°04' | 24°55' | 990.75    | 545.77    | 29 (1) | (79, no) |
| 53 | Børselva                    | 70°18' | 25°32' | 979.9     | 508.01    | 29 (0) | (no, no) |
| 54 | Langfjordelva               | 70°37' | 27°36' | 731       | 438.22    | 29 (2) | (no, no) |
| 55 | Tanaelva                    | 70°28' | 28°20' | 21 437.38 | 10 443.22 | 29 (0) | (no, no) |
| 56 | Vesterelva                  | 70°32' | 29°58' | 294.66    | 401       | 29 (0) | (no, no) |
| 57 | Komagelva                   | 70°14' | 30°32' | 876.52    | 444.58    | 29 (0) | (no, no) |
| 58 | Munkelva                    | 69°39' | 29°27' | 192.5     | 106.88    | 28 (0) | (no, 83) |
| 59 | Neidenelva                  | 69°42' | 29°24' | 3033.83   | 1282.49   | 29 (0) | (no, 83) |
| 60 | Karpelva                    | 69°40' | 30°23' | 251.81    | 129.75    | 28 (1) | (no, 83) |

---

<sup>a</sup>Rivers with liming within the studied years.

<sup>b</sup>Rivers infected with *Gyrodactylus salaris* within any of the studied years.

<sup>c</sup>Stocking programmes started within the study period.

<sup>d</sup>Presence of fish ladders built within the study period.
