# Supplementary material for: Quantifying the Ocean, Freshwater and Human Effects on Year-to-Year Variability of One-Sea-Winter Atlantic Salmon Angled in Multiple Norwegian Rivers
Source: PubMed Central journal article supplement (PMC3163678; doi:10.1371/journal.pone.0024005), 2011-08-29
Supplement: pone.0024005.s010.pdf [file pone.0024005.s010.pdf]

**Table S2.** Median dates as well as earliest and latest dates of smolt run of Atlantic salmon in some Norwegian watersheds over several years.

The descent date is defined as the day each year when 50% of the smolts have passed the gauging station.

| ID | River         | Location        | Smolt run (annual range) | Years | Period    | Reference                      |
|----|---------------|-----------------|--------------------------|-------|-----------|--------------------------------|
| 3  | Numedalslågen | 59°02'N 10°03'E | 4 May (29 April–10 May)  | 3     | 2003–2005 | Forseth, T. (pers. comm.)      |
| ni | Tovdalselva   | 58°12'N 8°04'E  | 17 May (3 May–23 May)    | 4     | 2004–2007 | Hesthagen (2008)               |
| ni | Mandalselva   | 58°01'N 7°27'E  | 8 May (30 April–21 May)  | 4     | 2004–2007 | Hesthagen (2008)               |
| ni | Imsa          | 58°54'N 5°58'E  | 15 May (7 May–25 May)    | 20    | 1976–1995 | Hvidsten <i>et al.</i> (1998)  |
| 9  | Suldalslågen  | 59°29'N 6°15'E  | 1 May (27 April–5 May)   | 10    | 1995–2004 | Saltveit (2004)                |
| ni | Guddalselva   | 59°58'N 6°00'E  | 2 May (28 April–17 May)  | 4     | 2005–2008 | Skaala, Ø. (pers. comm.)       |
| ni | Vosso         | 60°38'N 5°57'E  | 15 May (11 May–26 May)   | 7     | 2001–2007 | Barlaup (2008)                 |
| ni | Flåm          | 60°52'N 7°07'E  | 21 May (8 May–9 June)    | 5     | 2002–2006 | Sægrov <i>et al.</i> (2007)    |
| ni | Aurland       | 60°54'N 7°12'E  | 26 May (8 May–6 June)    | 5*    | 2001–2006 | Sægrov <i>et al.</i> (2007)    |
| ni | Eira          | 62°41'N 8°08'E  | 13 May (6 May–24 May)    | 8     | 2001–2008 | Jensen <i>et al.</i> (2009)    |
| 30 | Orkla         | 63°19'N 9°50'E  | 15 May (6 May–4 June)    | 22    | 1983–2006 | Hvidsten <i>et al.</i> (2009)  |
| 33 | Stjørdalselva | 63°26'N 10°54'E | 23 May (12 May–7 June)   | 15    | 1991–2006 | Arnekleiv <i>et al.</i> (2007) |

|    |          |                 |                                     |    |           |                               |
|----|----------|-----------------|-------------------------------------|----|-----------|-------------------------------|
| ni | Saltdal  | 67°06'N 15°25'E | 5 June (23 May–19 June)             | 6  | 1990–1995 | Hvidsten <i>et al.</i> (1998) |
| ni | Hals     | 70°02'N 22°58'E | 21 June (11 June–5 July)            | 16 | 1988–2004 | Hvidsten <i>et al.</i> (2009) |
| 49 | Altaelva | 69°58'N 23°23'E | 25 June (17 June–11 July)           | 7  | 1989–1995 | Hvidsten <i>et al.</i> (1998) |
| 55 | Tanaelva | 70°28'N 28°20'E | Early July (median June–early July) | 6  | 2002–2007 | Niemelä <i>et al.</i> (2009)  |

---

ni: indicates that the river is not included in the current analyses of grilse catches.

\*No data was gathered in 2004.

## References

- Arnekleiv JV, Rønning L, Koksvik J, Kjærstad G, Alfredsen K, et al. (2007) Ferskvannsbiologiske undersøkelser i Stjørdalselva 1990-2006. Faglig oppsummering: kraftverksregulering, bunndyr, drivfauna, ungfisk og smolt. NTNU Vitenskapsmuseet Rapport Zoologisk Serie 2007 No. 1: 141 p. (In Norwegian). Available: [http://www.ntnu.no/c/document\\_library/get\\_file?uuid=abd35162-1488-4050-afe3-25f6a12b8f20&groupId=10476](http://www.ntnu.no/c/document_library/get_file?uuid=abd35162-1488-4050-afe3-25f6a12b8f20&groupId=10476)
- Barlaup B (2008) Nå eller aldri for vossolaksen – anbefalte tiltak med bakgrunn i bestandsutvikling og trusselfaktorer. Direktoratet for Naturforvaltning Utredning 2008 No. 9: 176 p. (In Norwegian). Available: <http://www.nina.no/archive/nina/PppBasePdf/Kapitler/2008/Schartau%20Forsuring%20DNUUtredning%209%202008%20kap%207.pdf>
- Hesthagen T (2008) Reetablering av laks på Sørlandet. Årsrapport fra reetableringsprosjektet 2007. Direktoratet for Naturforvaltning Utredning 2008 No. 8: 63 p. (In Norwegian). Available: <http://www.dirnat.no/content.ap?thisId=631>

- Hvidsten NA, Heggberget TG, Jensen AJ (1998) Sea water temperatures at Atlantic salmon smolt entrance. *Nordic J Fresh Res* 74: 79–86.
- Hvidsten NA, Jensen AJ, Rikardsen AH, Finstad B, Aure J, et al. (2009) Influence of sea temperature and initial marine feeding on survival of Atlantic salmon *Salmo salar* post-smolts from the Rivers Orkla and Hals, Norway. *J Fish Biol* 74: 1532–1548.
- Jensen AJ, Bremset G, Finstad B, Hvidsten NA, Jensås JG, et al. (2009) Fiskebiologiske undersøkelser i Auravassdraget. Årsrapport 2008. NINA Rapport No. 451: 53 p. (In Norwegian). Available: <http://www.nina.no/archive/nina/PppBasePdf/rapport/2009/451.pdf>
- Niemelä E, Hassinen E, Muladal R, Brørs S, Sandring S (2009) Den atlantiske laksen (*Salmo salar*, L.) i Tanavassdraget I: miljøforholdene i den subarktiske Tanavassdraget og virkningen av dem på laksefisket og laksen. Fylkesmannen i Finnmark Rapport No. 5: 45 p. (In Norwegian). Available: <http://www.fylkesmannen.no/fagom.aspx?m=1887&amid=1001566>
- Sægrov H, Hellen BA, Kålås S, Urdal K, Johnsen GH (2007) Endra manøvrering i Aurland 2003-2006. Sluttrapport – Fisk. Rådgivende Biologer Rapport No. 1000: 103 p. (In Norwegian). Available: <http://www.e-co.no/filestore/Aurlandselvafiskeunderskelser2000-2007RdgBSluttrapport.pdf>
- Saltveit SJ (2004) Smoltutvandring hos laks i Suldalslågen 2004. Rapp. Lab. Ferskv. Økol. Innlandsfiske, Oslo No. 235: 30 p. (In Norwegian). Available: [http://www.statkraft.no/Images/Smoltutvandring%20hos%20laks%20i%20Suldalslågen%202004\\_tcm10-4164.pdf](http://www.statkraft.no/Images/Smoltutvandring%20hos%20laks%20i%20Suldalslågen%202004_tcm10-4164.pdf)
