# Supplementary material for: Quantifying the Ocean, Freshwater and Human Effects on Year-to-Year Variability of One-Sea-Winter Atlantic Salmon Angled in Multiple Norwegian Rivers
Source: PubMed Central journal article supplement (PMC3163678; doi:10.1371/journal.pone.0024005), 2011-08-29
Supplement: pone.0024005.s011.pdf [file pone.0024005.s011.pdf]

**Table S3.** Summary of the variables used in this large-scale analysis ( $n = 60$  one-sea-winter Atlantic salmon time series).

| Variable                                   | Mean  | Range      | Brief description                                                                                                             |
|--------------------------------------------|-------|------------|-------------------------------------------------------------------------------------------------------------------------------|
| Catch (C, in kg)                           | 1776  | 25–45 020  | Total catch (mainly rod) of one-sea-winter fish (1SW).                                                                        |
| Temperature (SST, in °C)                   | 8.09  | 5.83–13.00 | Coastal sea surface temperature expected to influence smolts entering the ocean.                                              |
| Runoff (R, in $\text{m}^3 \text{s}^{-1}$ ) | 99.16 | 0.69–1618  | Water flow expected to affect upstream migration.                                                                             |
| Coastal fishery (SF, in %)                 | 56.59 | 2.09–98.31 | Proportion of 1SW caught in the coastal ocean relative to total 1SW catches (sea fishery and recreational fishery in rivers). |
| Time (Y, in yr)                            | 1993  | 1979–2007  | Time trend of catches.                                                                                                        |
| Farming (F)                                | 29*   | na         | Presence/absence of net pens potentially influencing smolts on their way to the open ocean.                                   |
| Damming (HP)                               | 28**  | na         | Presence/absence of hydroelectric stations potentially influencing upstream migration.                                        |

na: not applicable.

\*Number of rivers out of 60 draining in areas with at least the presence of one farming license established during any year of the study period.

\*\*Number of rivers out of 60 that contained at least one hydroelectric scheme along the salmon-producing part of the river.
