# Supplementary material for: Quantifying the Ocean, Freshwater and Human Effects on Year-to-Year Variability of One-Sea-Winter Atlantic Salmon Angled in Multiple Norwegian Rivers
Source: PubMed Central journal article supplement (PMC3163678; doi:10.1371/journal.pone.0024005), 2011-08-29
Supplement: pone.0024005.s012.pdf [file pone.0024005.s012.pdf]

**Table S4.** Comparison of different models showing the number of parameters, Bayesian Information Criteria (BIC) and the difference in BIC values between each model and the model with the optimal random structure. First, we selected the appropriate random effects (Models 1 to 5) where the fixed component contained all explanatory variables and reasonable interactions. Then, different correlation structures (Autoregressive: AR, Moving Average: MA) for modeling within-group serial correlation were compared (Models 6 to 8), and heteroscedasticity was handled by modeling the residual variance as an exponential function of runoff (Model 9).

| Model n° | Random effects                   | Correlation structure | Parameters | BIC     | $\Delta$ BIC |
|----------|----------------------------------|-----------------------|------------|---------|--------------|
| 1        | none                             | none                  | 12         | 5274.94 | 1628.64      |
| 2        | $\beta_0$                        | none                  | 13         | 4036.39 | 390.01       |
| 3        | $\beta_0$ and $\beta_3$          | none                  | 14         | 4041.58 | 395.28       |
| 4        | $\beta_0$ and $\beta_6$          | none                  | 14         | 3889.74 | 243.44       |
| 5        | $\beta_0, \beta_3$ and $\beta_6$ | none                  | 15         | 3895.69 | 249.40       |
| 6        | $\beta_0$ and $\beta_6$          | AR(1)                 | 15         | 3662.06 | 15.76        |
| 7        | $\beta_0$ and $\beta_6$          | MA(1)                 | 15         | 3718.94 | 72.64        |
| 8        | $\beta_0$ and $\beta_6$          | ARMA(1,1)             | 16         | 3649.36 | 3.06         |
| 9        | $\beta_0$ and $\beta_6$          | ARMA(1,1)             | 17         | 3646.30 | 0            |

Note that, once the optimal random structure has been found (i.e. Model 9) using restricted maximum likelihood estimation (REML), the optimal fixed components were selected using maximum likelihood estimation (ML). The parameters of the final model presented in Table 1 in the main text were finally obtained using REML.
